# Supplementary material
Source: PubMed Central journal article supplement (PMC5338512)
Supplement: pnas.1616543114.sapp.pdf [file pnas.1616543114.sapp.pdf]

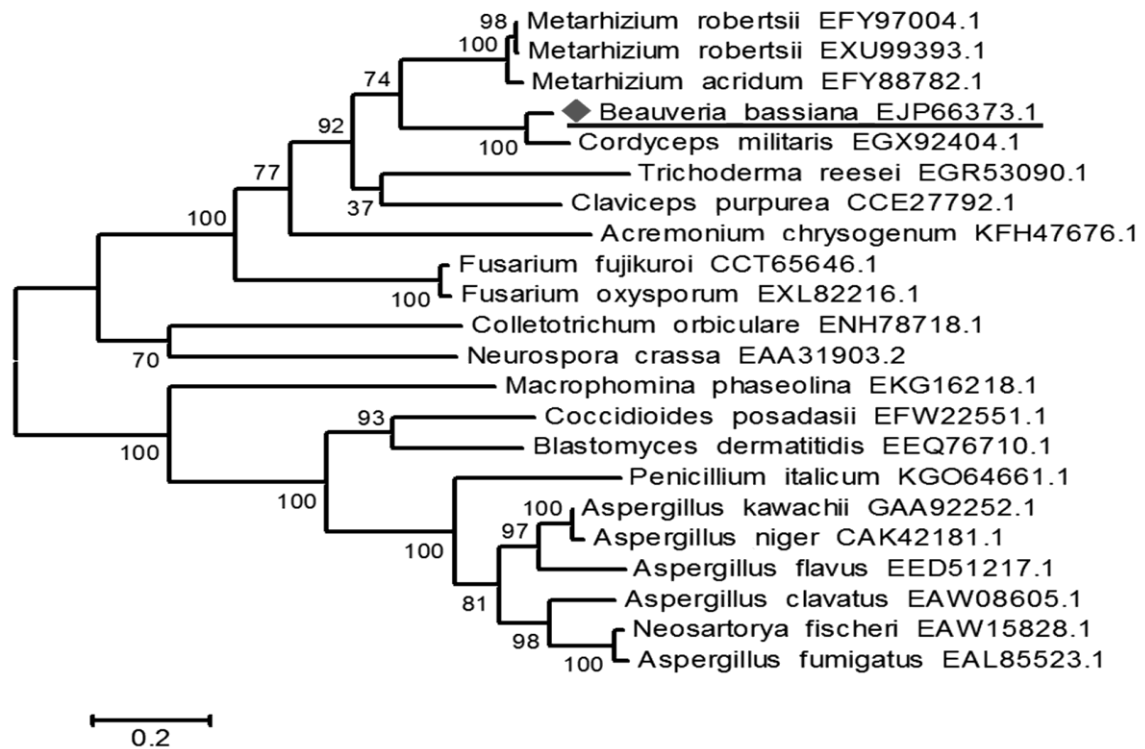

Fig. S1. Phylogenetic analysis of Bbsmr1.

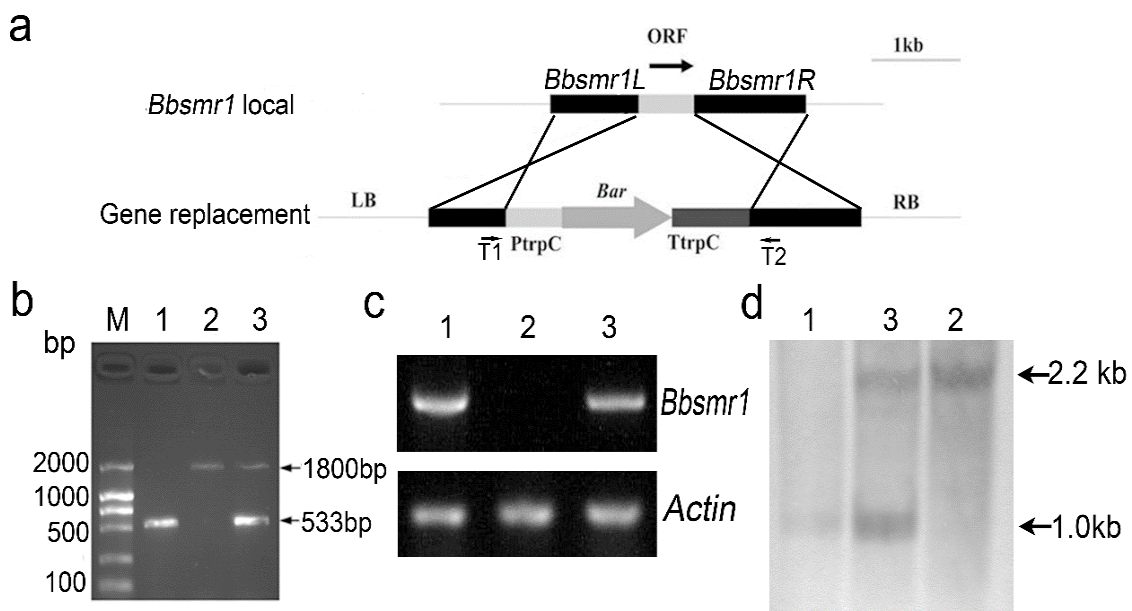

Fig. S2. (a) Schematic diagram of construction of  $\Delta Bbsmr1$  mutant and complementation strains. Screening and confirmation of the integrity of the strains by PCR (b), RT-PCR (c), and Southern blot (d). Lane 1, *B. bassiana* wild type, lane 2,  $\Delta Bbsmr1$ , lane 3, *CM*. About 300 bp fragment in the *Bbsmr1L* was used as a probe for Southern blot.

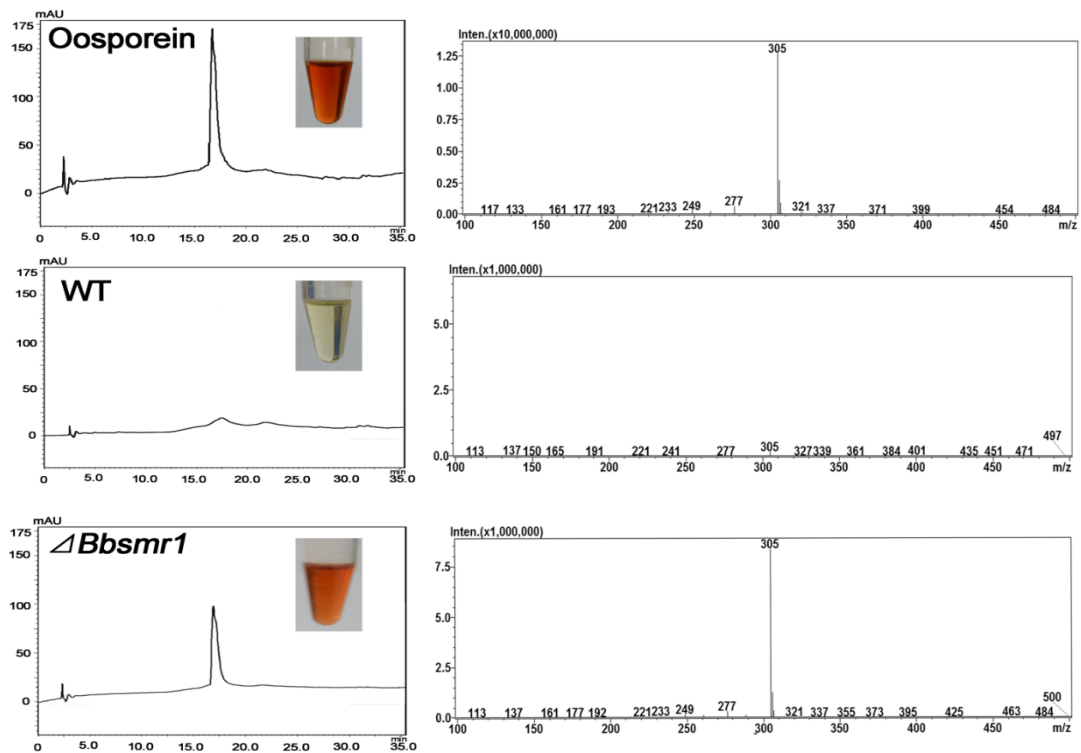

Fig. S3. Extraction and HPLC-MS analysis of culture supernatants derived from *B. bassiana* wild type (middle panel) and  $\Delta Bbsmr1$  mutant (bottom panel). Oosporein standard is shown in the top panel.

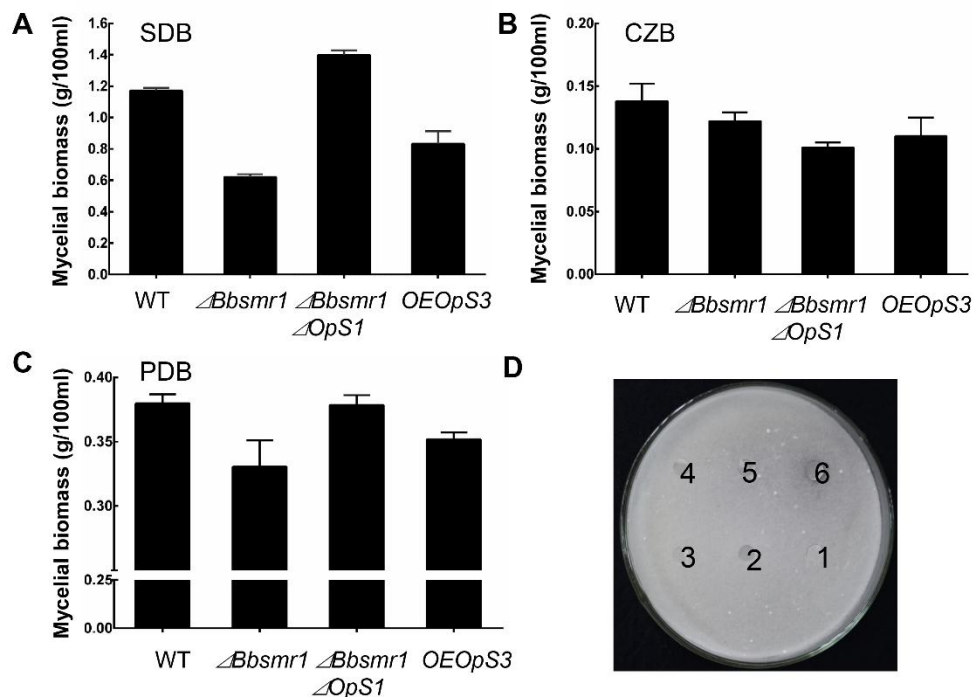

Fig. S4. Total mycelial biomass of *B. bassiana* wild type and mutant strains (A~C). D, Effects of oosporein on the growth of *B. bassiana*. 1 – 6, indicated oosporein concentration, 0, 0.05, 0.1, 0.5, 1.0, 2.0 mg/ml, respectively.

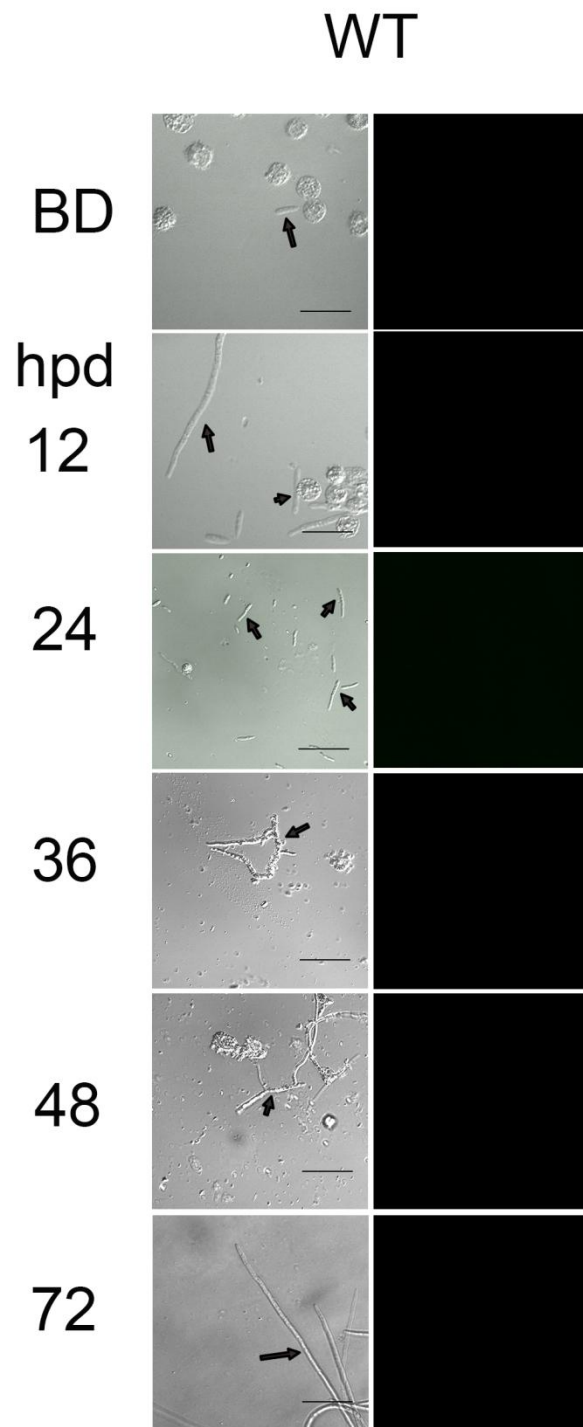

Fig. S5. DIC and fluorescent microscopy images of *B. bassiana* wild type grown in *G. mellonella* cadavers.

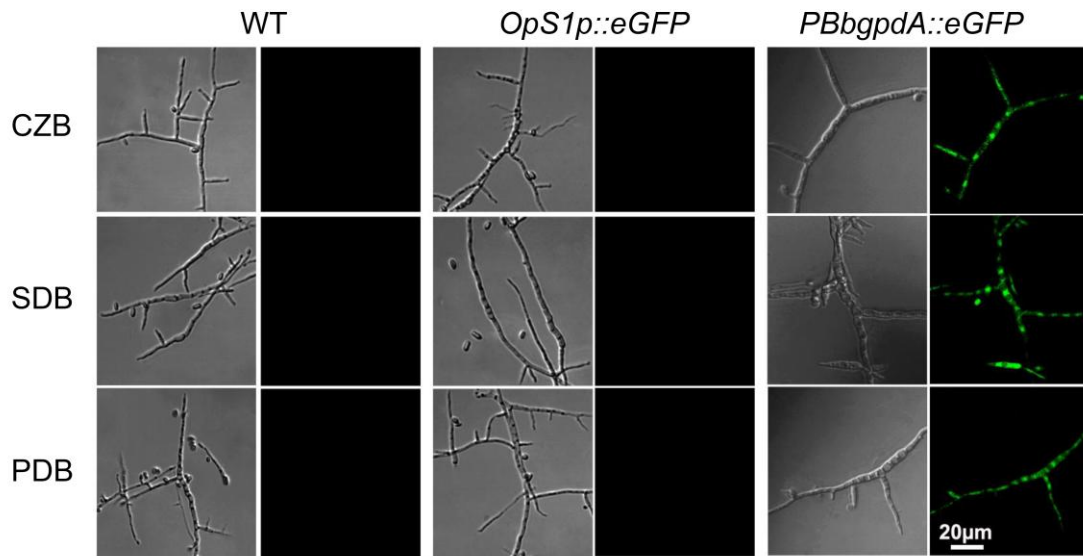

Fig. S6. DIC and fluorescent microscopy images of *B. bassiana* wild type and *OpS1p::eGFP* strains grown in CZB (Czapek-dox broth), SDB (Sabouraud dextrose broth), and PDB (Potato dextrose broth) for 3 d at 26 °C. The constitutive eGFP producing strain, *pBbgpdA::eGFP*, was used as a positive control.

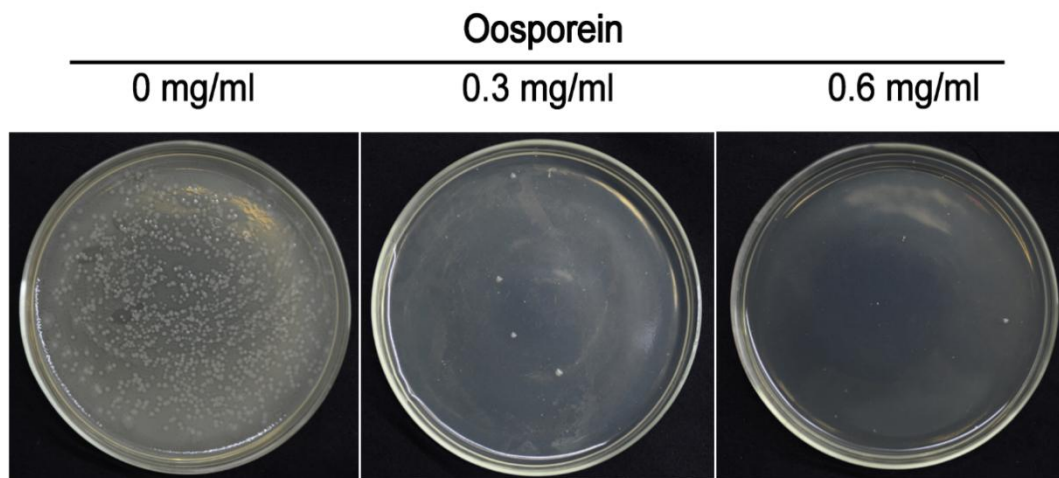

Fig. S7. Antimicrobial activity of oosporein on total bacteria isolated from *G. mellonella* cadavers.

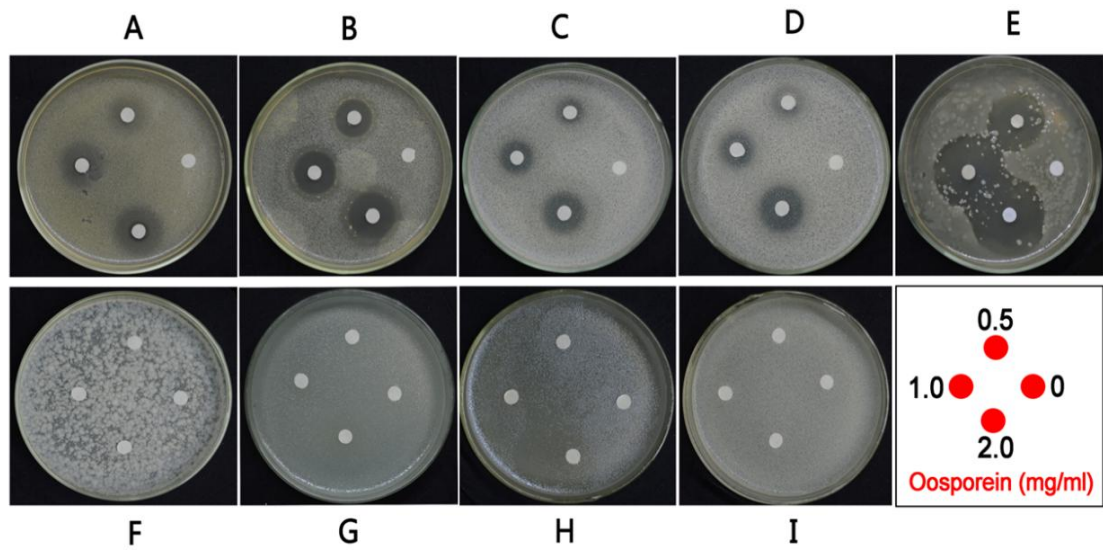

Fig. S8. Antibacterial activity of oosporein. Different concentrations of oosporein (0, 0.5, 1 and 2 mg/ml in citric acid buffer, 50 mM, pH 6.0), was added to bacterial plates inoculated with lawns of *Staphylococcus aureus* N315 (A), *E. coli* (B), *Bacillus thuringiensis* BT-1003 (C), *Bacillus thuringiensis* BT-YZ (D), bacteria from insect cadavers killed by *B. bassiana* (E), BT-1003, (F), *Acinetobacter Bauman* (G), *Pseudomonas aeruginosa* PA01 (H), *Pseudomonas aeruginosa* PA14 (I) Citric acid buffer (50 mM, pH 6.0) was used as a negative control.

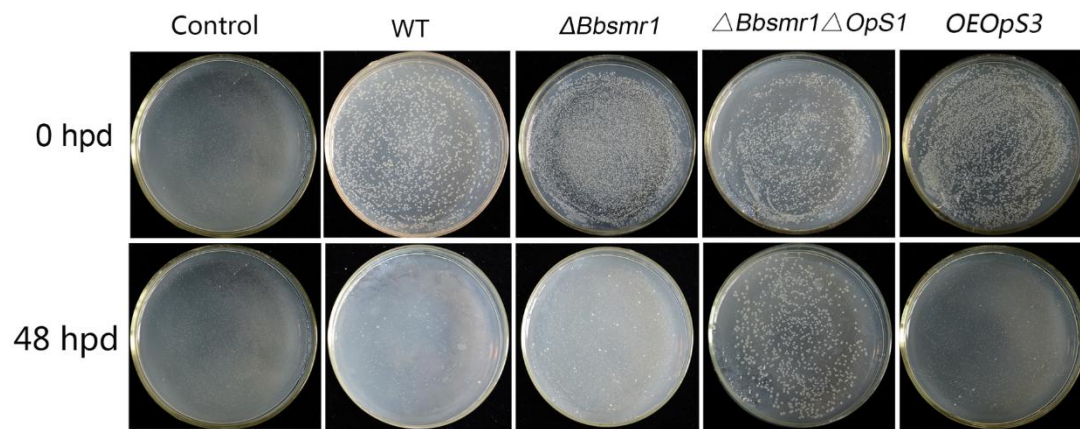

Fig. S9. Representative images of enumeration plates showing bacterial colonies from infected *G. mellonella* cadavers killed by the indicated *B. bassiana* strains at 0 and 48 h post death. Sterile H<sub>2</sub>O was used as a control.

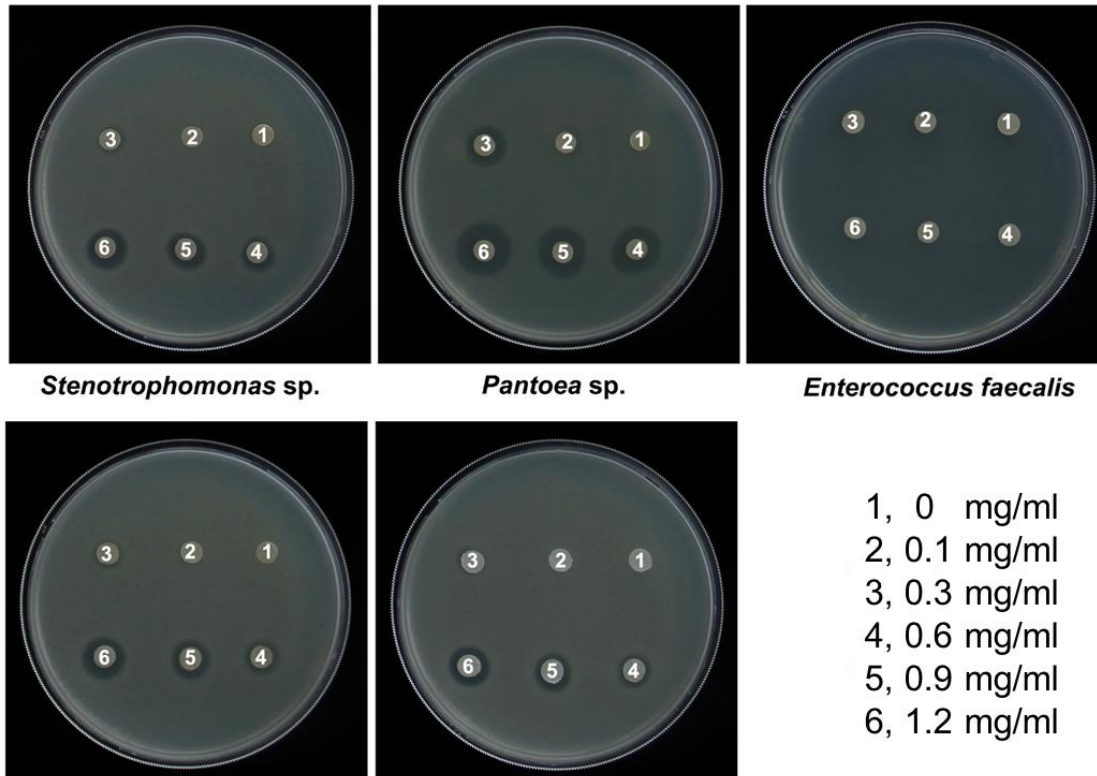

**Stenotrophomonas sp.**      **Pantoea sp.**      **Enterococcus faecalis**

**Acinetobacter calcoaceticus**      **Staphylococcus sp.**

Fig. S10. Antibacterial activity of oosporein against bacteria isolated from *G. mellonella* cadaver infected by *B. bassiana*. Different concentrations of oosporein (1 ~ 6, indicated 0, 0.1, 0.3, 0.6, 0.9, 1.2 mg/ml in citric acid buffer, 50mM, pH6.0) was added to bacterial plates.

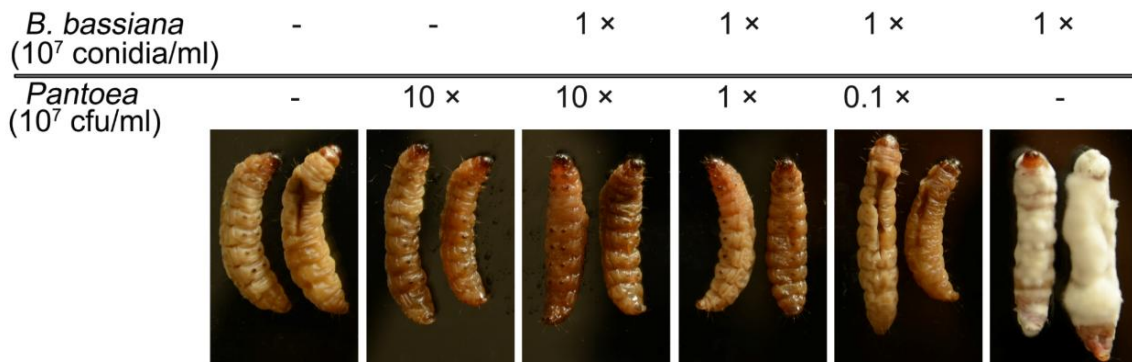

Fig. S11. Effects of *Pantoea* on *B. bassiana* growth on *G. mellonella* cadavers. Sterilized *G. mellonella* larvae (121°C for 15 min) were injected with indicated ratios of fungal spores ( $1 \times 10^7$  conidia/ml):bacteria (0.1 ~  $10 \times 10^7$  cfu/ml). Larvae were placed at 26°C for 5 days, and fungal growth was observed visually.

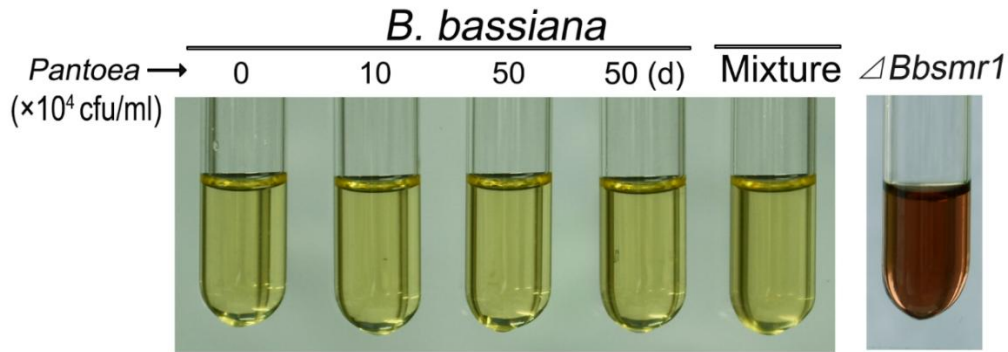

Fig. S12. Lack of oosporein production during *in vitro* co-culture of *Pantoea* and *B. bassiana*. *B. bassiana* was cultured in 0.5×SDB for 36 h, after which *Pantoea* at indicated concentrations as well as bacterial mixture isolated from cadaver (Mixture) were added to the growing fungal culture and the co-culture was incubated for additional 36 h at 26°C. Controls include addition of heat killed/sterilized *Pantoea* (sample 50(d), negative control) and the *Bbsmr1* deletion mutant (positive control).

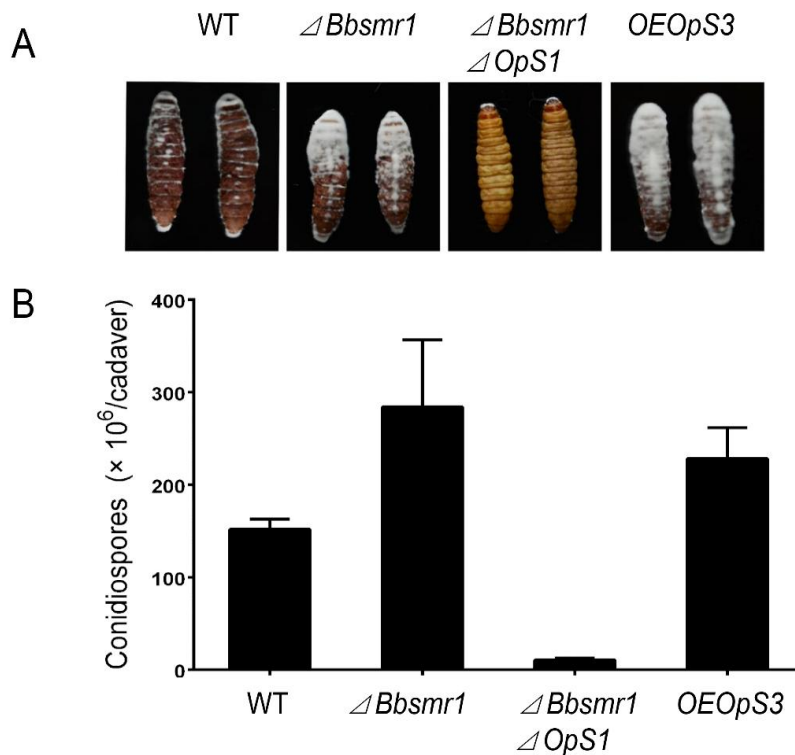

Fig. S13. Representative images of fungal growth (A, 3 d post death) and quantification of conidiation (B, 6 d post death) on *G. mellonella* cadavers killed by the indicated strains. The cadavers infected by wild type,  $\Delta Bbsmr1$ ,  $\Delta Bbsmr1 \Delta OpS1$  and OEOP33 were placed at 26°C for 1-6 d.

**Table S1. Primers used in this study**

| <b>For Bbsmr1 gene tagging</b>         |                                                                 |
|----------------------------------------|-----------------------------------------------------------------|
| L1                                     | TGTCGTGCCAGCTGCATTAA                                            |
| L2                                     | GCAATTCGGCGTTAATTCAG                                            |
| R1                                     | TTTCGCCAGCTGGCGTAATA                                            |
| R2                                     | GAGCTTGGATCAGATTGTC                                             |
| SiteFinder-1                           | CGACACGCTACTCAACACACCACCTCGCACAGCGTCCT<br>CAAGCGGCCGCNNNNNNGCCT |
| SiteFinder-2                           | CGACACGCTACTCAACACACCACCTCGCACAGCGTCCT<br>CAAGCGGCCGCNNNNNNGCGC |
| SFP1                                   | CGACACGCTACTCAACACAC                                            |
| <b>For recombination and screening</b> |                                                                 |
| <b>Primer</b>                          | <b>Oligonucleotide sequence (5'-3')</b>                         |
| PsmrL1                                 | ACTCGAATTCCTCGAGACTCAAAGAGCTCTTGGTGC                            |
| PsmrL2                                 | ATGCGAATTCAAAGTCTCTCCATGAGATGC                                  |
| PsmrR1                                 | ATGCTCTAGATGCTCATGGGAGCAAGAC                                    |
| PsmrR2                                 | ACTGAAGCTTACTAGTAAGAGGGTCACTCTTGAC                              |
| PsmrT1                                 | TCGTGCTTGCTTTGTGCTTG                                            |
| PsmrT2                                 | TGGAGGCTAAAGAGTCGCTG                                            |
| PsmrC1                                 | GCGAATTCCCGCATAGATCCCTGTCGTA                                    |
| psmrC2                                 | CGTCTAGACAGGAGGGTTGTCAGCAAGCA                                   |
| Psmr-sb1                               | CCATGAGATGCAGGCTCCTT                                            |
| Psmr-sb2                               | GCAAACCCACTTCTTCTTG                                             |
| POpS1LB1                               | CCCAAGCTTCTAGA CTTAGAACACTCCTGTGAGG                             |
| POpS1LB2                               | GGACTAGTGAGAGGATTGGTGCTGAAAG                                    |
| POpS1RB1                               | GGACTAGTAGAGGCCAAATCCATGGATC                                    |
| POpS1RB2                               | CGGAATTCGGTTGGCATGATAGGCTCAC                                    |
| POpS3LB1                               | AATCCTTCTTTCTAGAAGCTTCTACCCGAGACATGCAC<br>TCA                   |
| POpS3LB2                               | GGTCTAGAGCTTGGACGGACGTAACATT                                    |
| POpS3RB1                               | GGACTAGTTCTCAGTCAGGCGACATACG                                    |
| POpS3RB2                               | GCAGGTGCACTCTAGGAATCCATCGTCCAGAGCTTCA<br>ACA                    |
| POpS1t1                                | ACCATGAGAGTCTCCTGGAG                                            |
| POpS1t2                                | AGGCCGTCTGCAGGAGAATG                                            |
| POpS3t1                                | AAGCATGCGAGACAGCCTCG                                            |
| POpS3t2                                | AGAGCAGGGAATCTGCTGCT                                            |
| <b>For Real Time PCR</b>               |                                                                 |
| <b>Primer</b>                          | <b>Oligonucleotide sequence (5'-3')</b>                         |
| Bbsmr-RTU                              | CAGCTTGGCAATATGAAGAC                                            |
| Bbsmr-RTD                              | AACATGGGGTAACGGCTGCTG                                           |
| OpS14-RTU                              | CGGCTACTACGAAACCATT                                             |
| OpS14-RTD                              | CAGAGTCTTTGCGGATGG                                              |
| OpS13-RTU                              | GACCTGACTACCGAGGCTAC                                            |



|               |                                         |
|---------------|-----------------------------------------|
| OpS13-RTD     | AGGCGTGACGGAAATAGA                      |
| OpS12-RTU     | TTGGAGACAAAGGTGGAAATCG                  |
| OpS12-RTD     | ACGGCAAACGCAGACAGG                      |
| OpS11-RTU     | CATCCCGTCCCTCAACCA                      |
| OpS11-RTD     | TCCGTCTCCGCATCCAAC                      |
| OpS10-RTU     | GCGGATCAGTTCAACAAT                      |
| OpS10-RTD     | TTCGGTAAGGGTAGTGCC                      |
| OpS9-RTU      | TGAGTGGCTGGCTTTGTG                      |
| OpS9-RTD      | CATGCGAGGTATAGGAGACG                    |
| OpS8-RTU      | CGACCAGTGCGGCAAGTA                      |
| OpS8-RTD      | TCACGCTTTCGGGTCCAA                      |
| OpS7-RTU      | CACTACCTGCCCTTTCCG                      |
| OpS7-RTD      | CCGTGGTGTACTCCCTGTAA                    |
| OpS6-RTU      | CTGGAGATTAAGAGGGTGCT                    |
| OpS6-RTD      | TGTAGTGCGGGACAAAGG                      |
| OpS5-RTU      | TCTGTAGCGGCTGAAATT                      |
| OpS5-RTD      | TTGCTCGTAGTAGTTGGTGT                    |
| OpS4-RTU      | GACGGCGTGGCTGTGATA                      |
| OpS4-RTD      | CAGTCGTAGGATGATGCGATAT                  |
| OpS3-RTU      | AAACAATAAGGCAGTTGGAGA                   |
| OpS3-RTD      | GATGTCACTTGGCGGTTG                      |
| OpS2-RTU      | CAAGAGGCGAGGAACAGC                      |
| OpS2-RTD      | CATACCAGACCACCATAGACG                   |
| OpS1-RTU      | GCCGAAGGTGACCGTATT                      |
| OpS1-RTD      | GCGGGTTGATTCTGGACT                      |
| Actin-F       | GTCAAGTCATCACCATTGGC                    |
| Actin-R       | GAGGAGCAATGATCTTGACC                    |
| gpd-F         | GTGTCTTCACTACTGAG                       |
| gpd-R         | TGTAGCCGAGAATGCCCTTG                    |
| cypA-F        | CACGAACCATAACGGCACTG                    |
| cypA-R        | GAGTCGCTACCGAACTTCTC                    |
|               | <b>For others</b>                       |
| <b>Primer</b> | <b>Oligonucleotide sequence (5'-3')</b> |
| POpS3-O1      | GCTCTAGAAATGTTTTACACTTTCAATGCTG         |
| POpS3-O2      | GCTCTAGATCAAACGAATATAATTCGGAA           |
| Ppops1-1      | GGTCTAGAGCCTGCTTGAGAGCTTGGCCA           |
| Ppops1-2      | GGGCGGCCGCGTTGAGAAATGGAAAAGATTCA        |
| Pgpda-t       | TCCATTCCATCTCGAGCTTCA                   |
| 338F          | ACTCCTACGGGAGGCAGCAG                    |
| 806R          | GGACTACHVGGGTWTCTAAT                    |
